# Supplementary material for: Strain-tunable optoelectronic and photocatalytic properties of 2D GaN/MoSi2P4 heterobilayers: potential optoelectronic/photocatalytic materials
Source: Royal Society of Chemistry journal article supplement (doi:10.1039/d4nr04545a), 2024-12-17
Supplement: d4nr04545a1.pdf [file d4nr04545a1.pdf]

Supporting Information for

**Strain-tunable optoelectronic and photocatalytic properties of 2D  
GaN/MoSi<sub>2</sub>P<sub>4</sub> heterobilayers: Potential optoelectronic/photocatalytic  
materials**

Huabing Shu<sup>\*a</sup>, Feifan Wang<sup>b</sup>, Kai Ren<sup>\*c</sup>, Jiyuan Guo<sup>a</sup>

<sup>a</sup> School of Science, Jiangsu University of Science and Technology, Zhenjiang 212001, China

<sup>b</sup> Jiangsu Co-Innovation Centre of Efficient Processing and Utilization of Forest Resources, College of Chemical Engineering, Nanjing Forestry University, Nanjing 210037, China

<sup>c</sup> School of Mechanical and Electronic Engineering, Nanjing Forestry University, Nanjing 210037, China

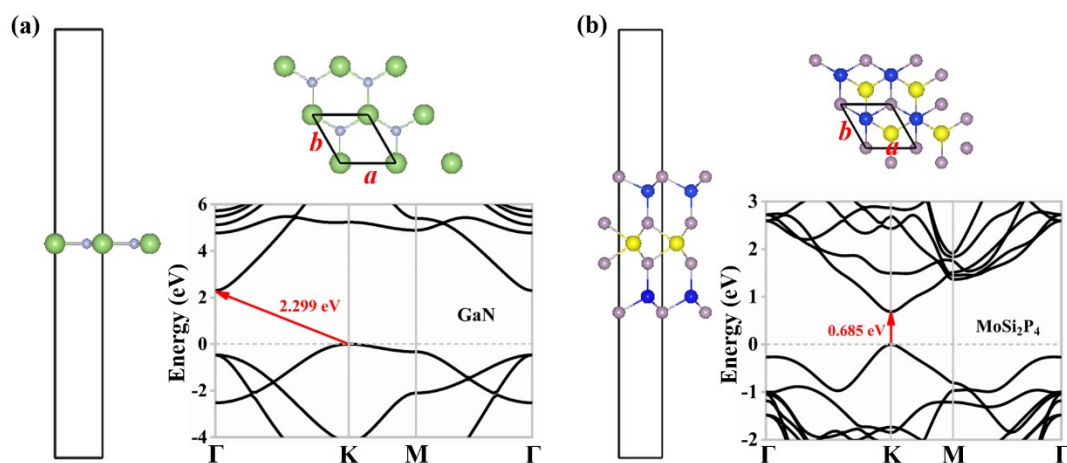

**Fig. S1** Top (side) views and band structures of isolated monolayers: (a) GaN and (b) MoSi<sub>2</sub>P<sub>4</sub>. The band structures are calculated by the PBE method.

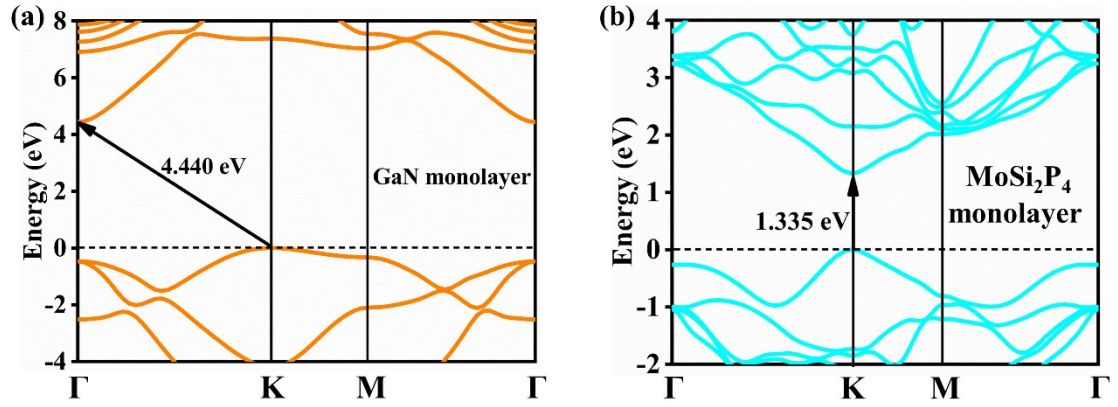

**Fig. S2** Quasi-particle band structures of GaN monolayer and MoSi<sub>2</sub>P<sub>4</sub> monolayer at  $G_0W_0$  level.

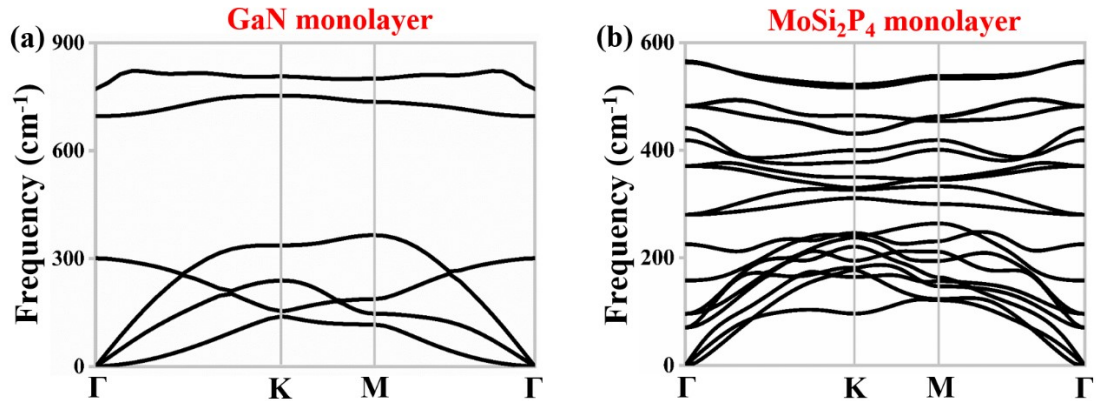

**Fig. S3** Phonon spectra of isolated GaN and MoSi<sub>2</sub>P<sub>4</sub> monolayers.

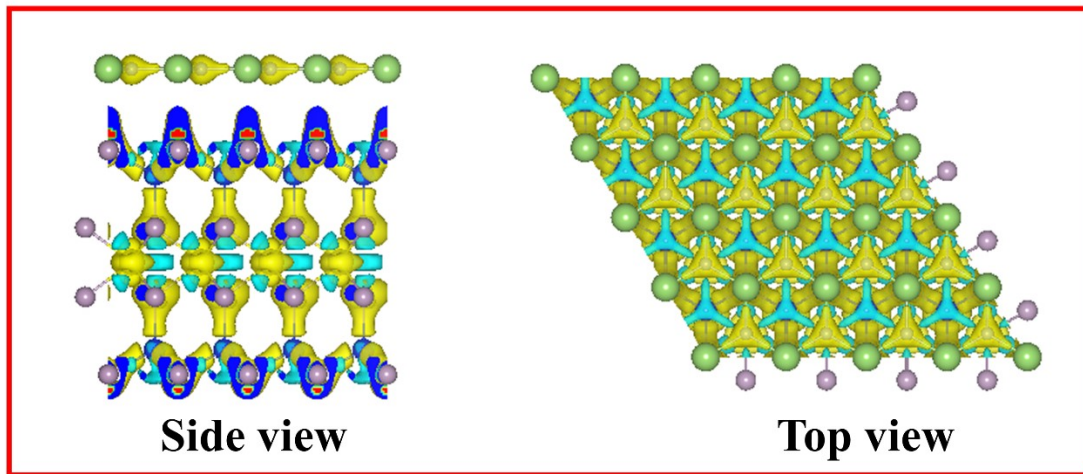

**Fig. S4** Differential charge density with an isosurface value of  $1.0 \times 10^{-3} \text{ e} \cdot \text{\AA}^{-3}$  along the  $c$  direction for the AA5 GaN/MoSi<sub>2</sub>P<sub>4</sub> heterosbilayer. The yellow and cyan suggest the gain and loss of electrons, respectively.

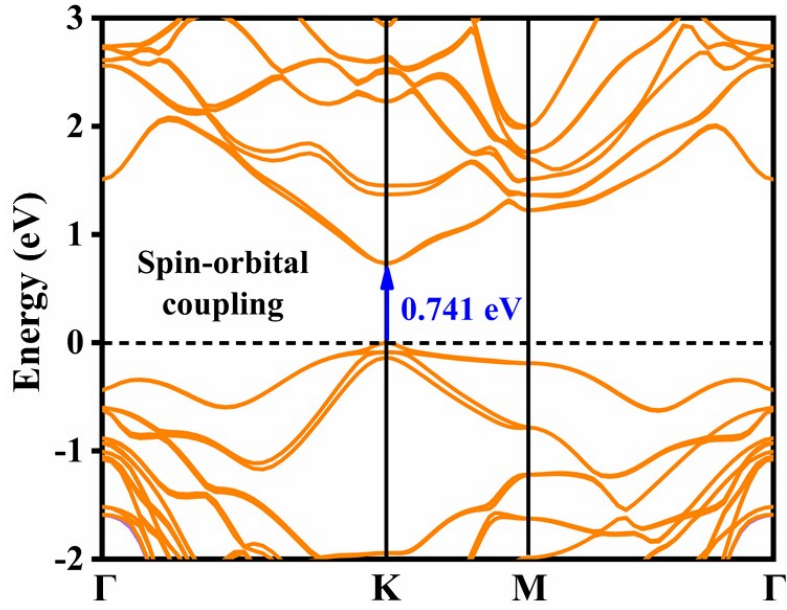

**Fig. S5** Calculated band structures of the AA5 GaN/MoSi<sub>2</sub>P<sub>4</sub> heterobilayer with the spin-orbit coupling effects at the PBE level.

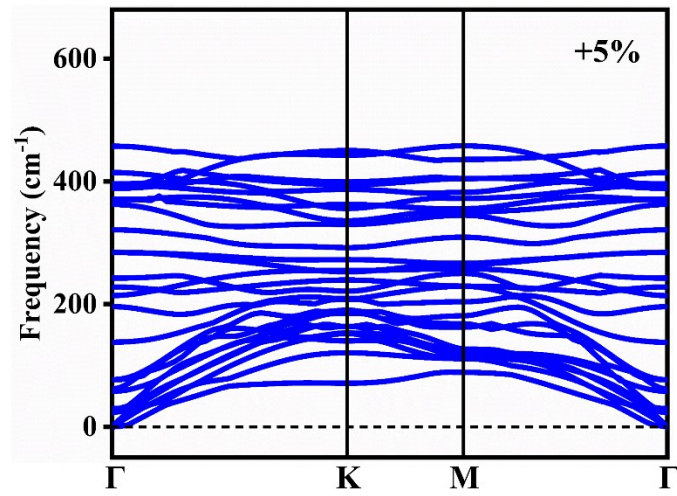

**Fig. S6** Phonon spectrum of AA5 GaN/MoSi<sub>2</sub>P<sub>4</sub> heterobilayer at +5% biaxial tensile strain.

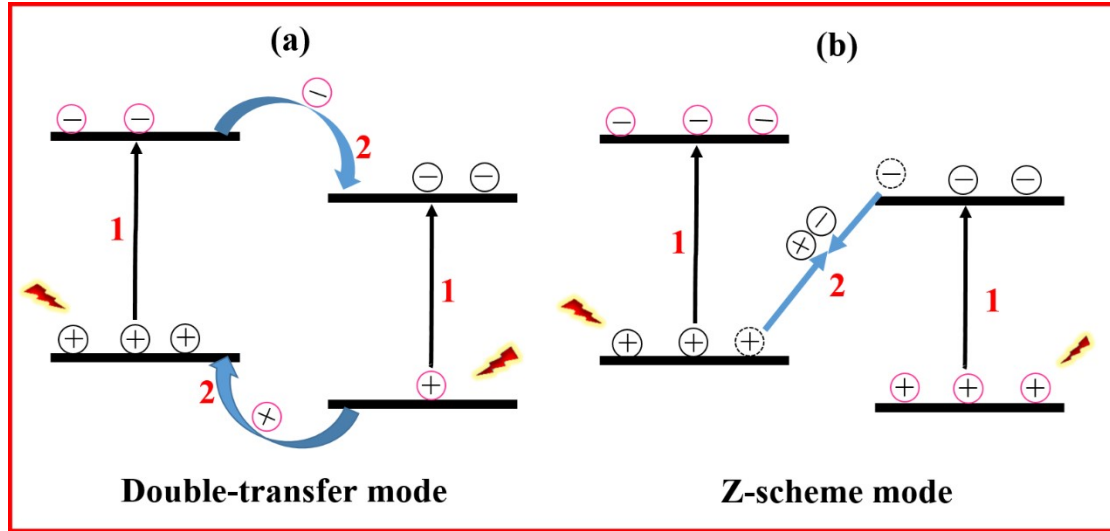

**Fig. S7** Two kinds of modes of charge transfer in type-II heterostructure: (a) Double-transfer mode, (b) Z-scheme mode.

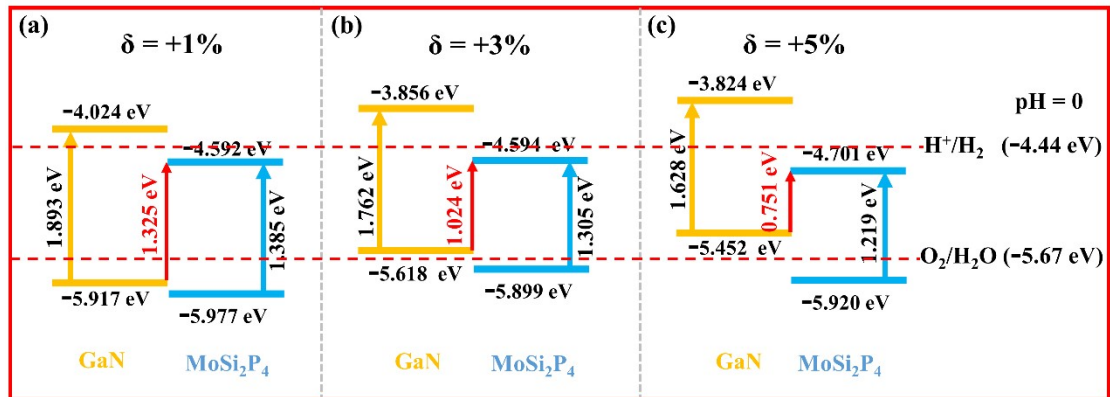

**Fig. S8** The positions of two band edges of GaN/MoSi<sub>2</sub>P<sub>4</sub> vdW heterostructure compared to the vacuum level under different tensile strains: (a) +1%, (b) +3%, (c) +5%. The calculated results are based on the  $G_0W_0$  level.
